# Supplementary material
Source: MDPI journal article supplement (https://www.mdpi.com/2571-6131/4/2/19)
Supplement: s1 [file s1]

# Synthesis of Oxide Ceramics in Detonating Atmosphere

Pierre Gibot

Laboratoire des Nanomatériaux pour Systèmes Sous Sollicitations Extrêmes (NS3E),  
ISL-CNRS-UNISTRA UMR 3208, Institut Franco-Allemand de Recherches de Saint-Louis (ISL),  
5 rue du Général Cassagnou, BP70034, 68301 Saint-Louis, France; pierre.gibot@isl.eu; Tel.: +33-(0)3-89-69-58-77

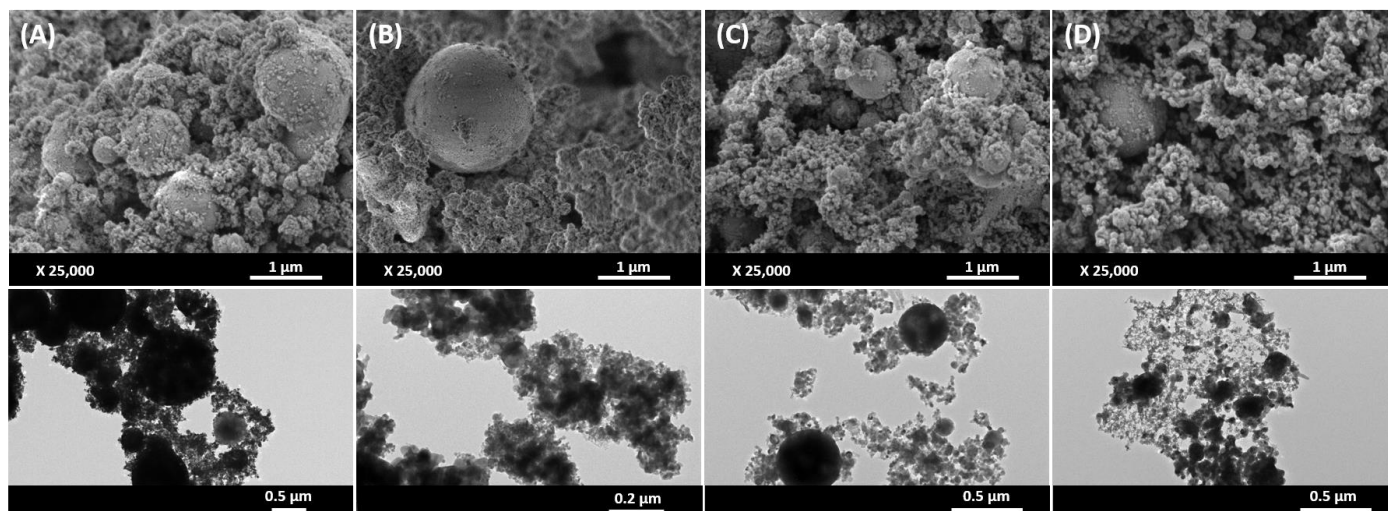

**Figure S1.** SEM (top) and TEM (down) low magnified images of pristine oxide ceramics: (A) CeO<sub>2</sub>, (B) HfO<sub>2</sub>, (C) Nb<sub>2</sub>O<sub>5</sub>, and (D) In<sub>2</sub>O<sub>3</sub>.

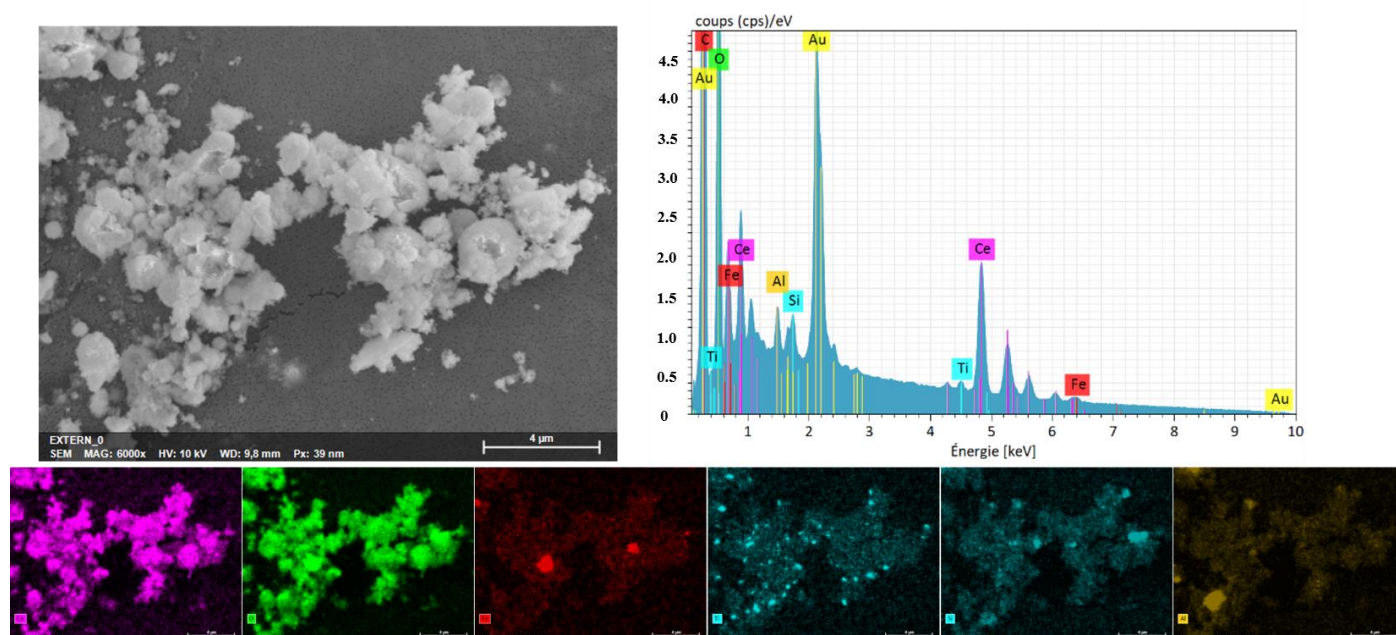

(A). EDS analysis of the CeO<sub>2</sub> material.

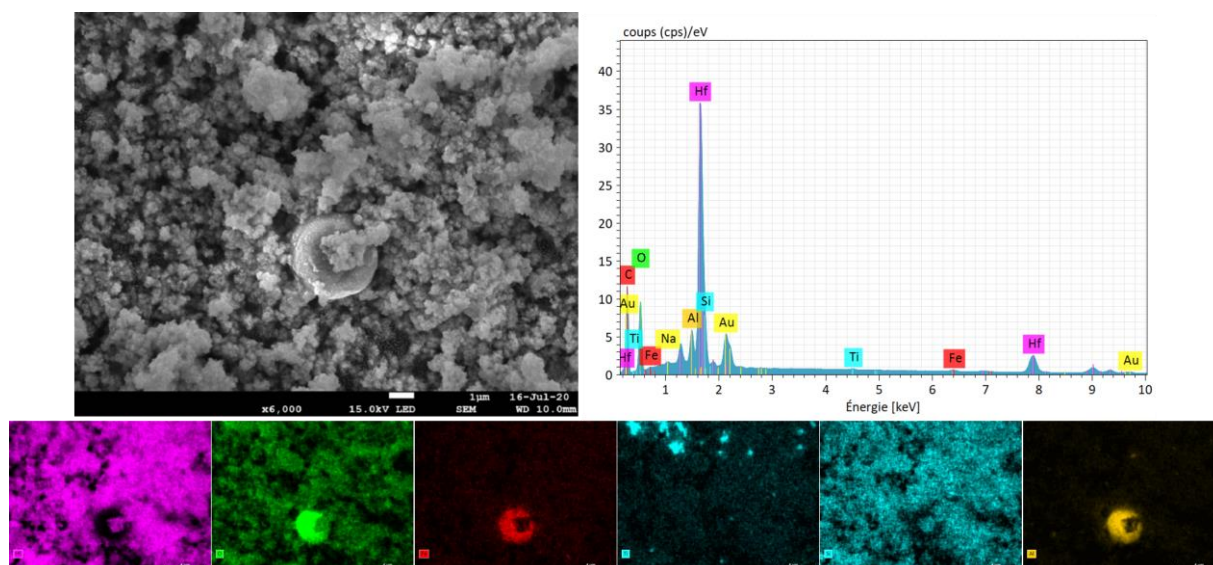

(B). EDS analysis of the HfO<sub>2</sub> material.

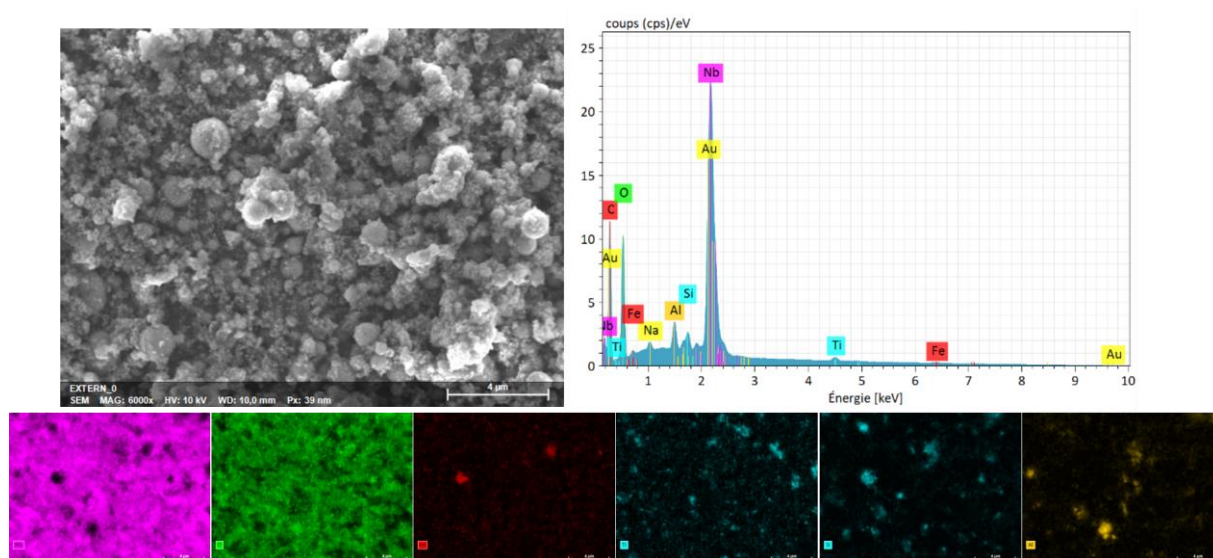

(C). EDS analysis of the Nb<sub>2</sub>O<sub>5</sub> material.

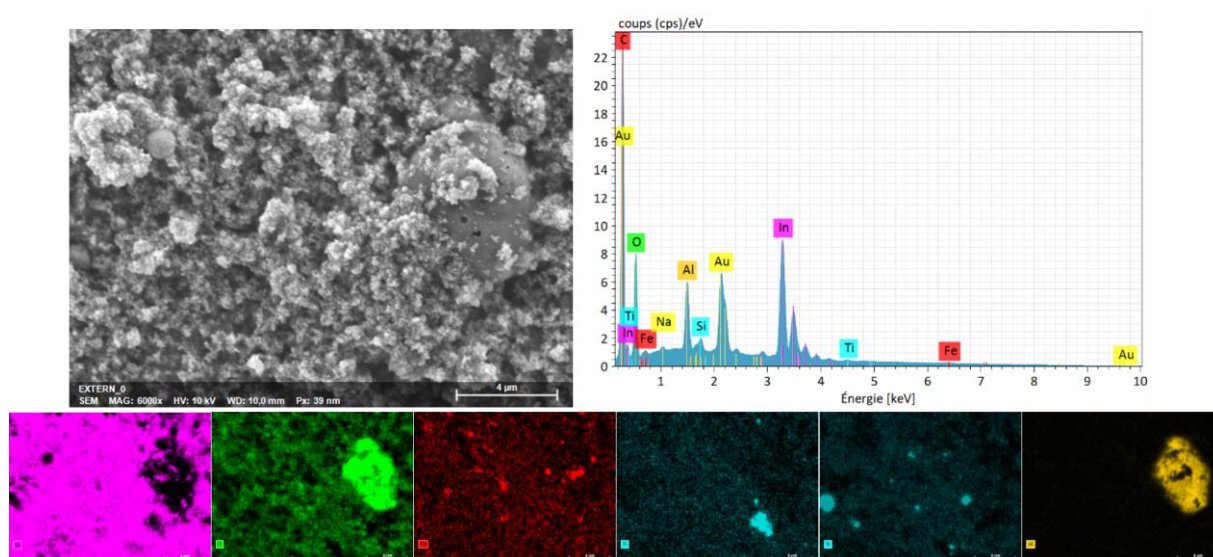

(D). EDS analysis of the In<sub>2</sub>O<sub>3</sub> material.

**Figure S2.** Elemental mappings of the different calcinated as-detonated oxide ceramics: **(A)** CeO<sub>2</sub>, **(B)** HfO<sub>2</sub>, **(C)** Nb<sub>2</sub>O<sub>5</sub>, and **(D)** In<sub>2</sub>O<sub>3</sub>. The qualitative analyses were carried out by using a scanning electron microscope (SEM—JEOL JSM-7900F) equipped with an energy-dispersive X-ray spectroscopy device (EDS—Bruker Quantax XFlash® 6/30). The iron species originates from rust (Fe<sub>2</sub>O<sub>3</sub>) present in certain places inside the detonation chamber. The titanium, silicon and aluminum species come from the paint (based on TiO<sub>2</sub>, SiO<sub>2</sub> and Al<sub>2</sub>O<sub>3</sub>, etc.) that covers the inner walls of the detonation chamber. In a global point of view, the different oxide ceramics were made of the ceramic-salt derived metal (Ce(SO<sub>4</sub>)<sub>2</sub>·4H<sub>2</sub>O, HfOCl<sub>2</sub>·8H<sub>2</sub>O, C<sub>10</sub>H<sub>5</sub>NbO<sub>20</sub>·xH<sub>2</sub>O, and In(OOCCH<sub>3</sub>)<sub>3</sub>) accompanied by some traces of impurities identified as coming from the detonation chamber. While oxide ceramics were constituting of nano- and micron-sized (≤1 μm) particles, impurities were represented by particles exhibiting a size largely higher than 1 μm.
